# Supplementary material for: Identifying the Active Phase of RuO2 in the Catalytic CO Oxidation Reaction, Employing Operando CO Infrared Spectroscopy and Online Mass Spectrometry
Source: MDPI journal article supplement (doi:10.3390/catal13081178), 2023-08-01
Supplement: s1 [file s1]

**Table S1.** XPS fit parameters.

| <i>Species</i>   | <i>Peak</i>                 | <i>Binding energy</i> | <i>FWHM</i> | <i>Fitting parameters</i> |
|------------------|-----------------------------|-----------------------|-------------|---------------------------|
| Ru               | 3d <sub>5/2</sub>           | 279.9                 | 0.93        | LF(0.8,1.25,500,180)      |
|                  | 3d <sub>3/2</sub>           | 284.1                 | 0.93        | LF(1.01,1.25,500,50)      |
| RuO <sub>2</sub> | 3d <sub>5/2</sub>           | 280.6                 | 0.9         | LF(0.4,1,45,280)          |
|                  | 3d <sub>3/2</sub>           | 285.4                 | 1.2         | LF(0.4,1,45,280)          |
|                  | 3d <sub>5/2</sub> satellite | 282.4                 | 2.15        | LF(0.6,1,45,280)          |
|                  | 3d <sub>3/2</sub> satellite | 286.6                 | 2.20        | LF(0.4,1,45,280)          |
|                  |                             |                       |             |                           |
| C                | 1s                          | 285.1                 | 1.36        | GL(30)                    |
| C-oxid           | 1s                          | 288.8                 | 1.00        | GL(30)                    |

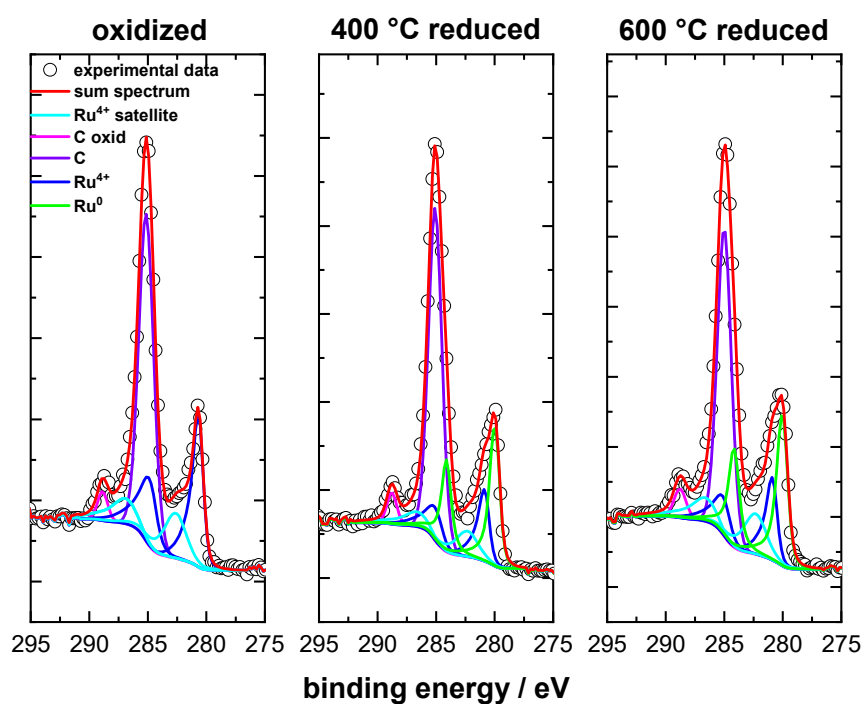

**Figure S1.** Ru 3d XP spectra of oxidized and reduced RuO<sub>2</sub>. The reduction was carried out under 4% H<sub>2</sub> in Ar for 12 h at the stated temperatures.

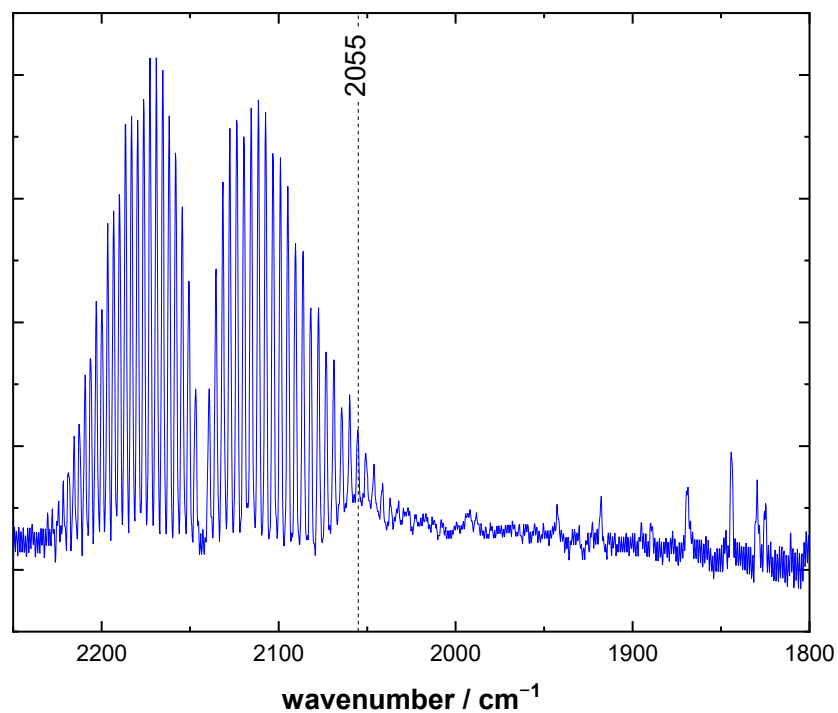

**Figure S2.** DRIFTS spectrum of CO adsorption on  $\text{Ru}^0\text{-TiO}_2$ , which has after oxidative pretreatment under 4%  $\text{O}_2$  at 300 °C for 12h. As previously shown for  $\text{RuO}_2\text{-TiO}_2$  only one band without shoulder is observed.

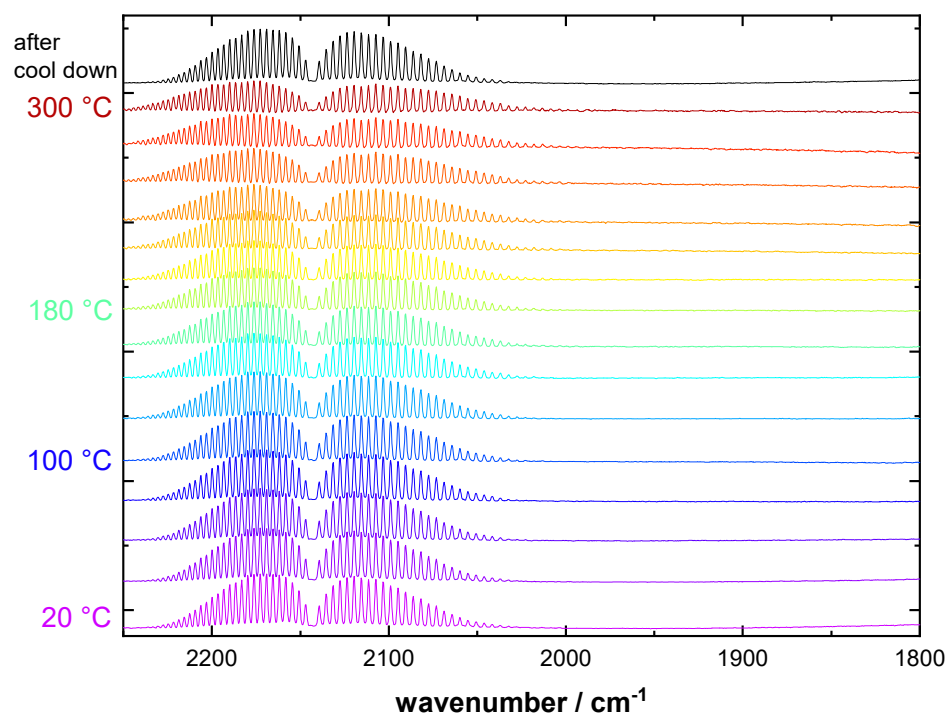

**Figure S3.** IR spectra of pre-oxidized  $\text{TiO}_2$  heated in a CO atmosphere. CO adsorption bands are not observed, while the RoVi finr structure of CO gas appears between 2100-2200  $\text{cm}^{-1}$ .

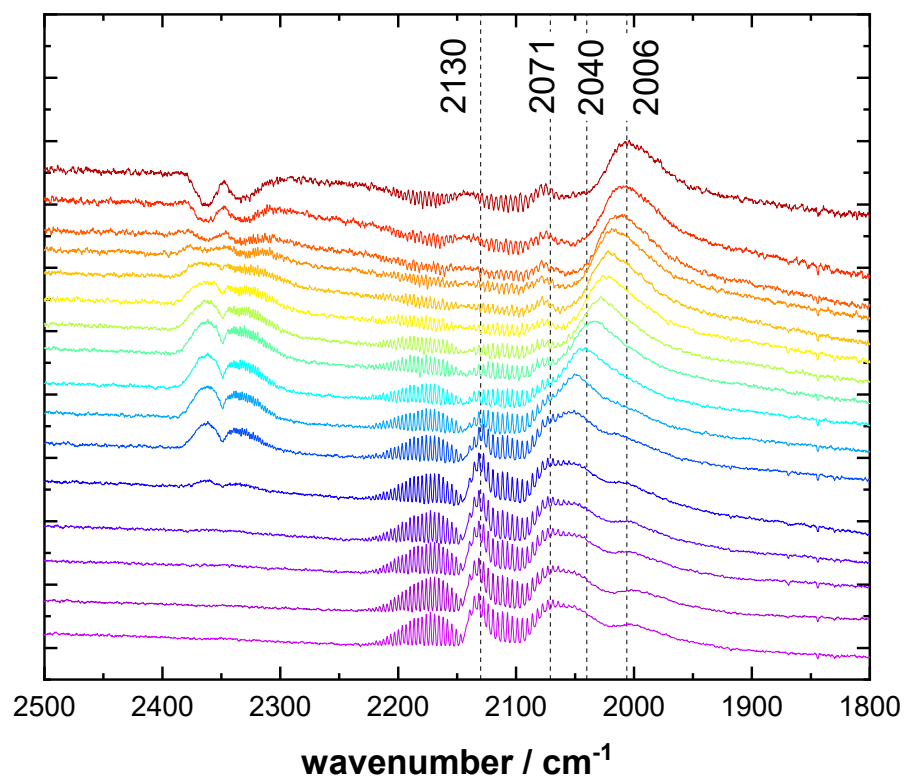

**Figure S4.** Operando DRIFT spectra of reduced-RuO<sub>2</sub>@TiO<sub>2</sub> during cool down under reducing (1% O<sub>2</sub>/4% CO/95% Ar) reaction feed composition. Temperature increment between consecutive spectra is 20 °C. The heating ramp is 1.8 K·min<sup>-1</sup>.

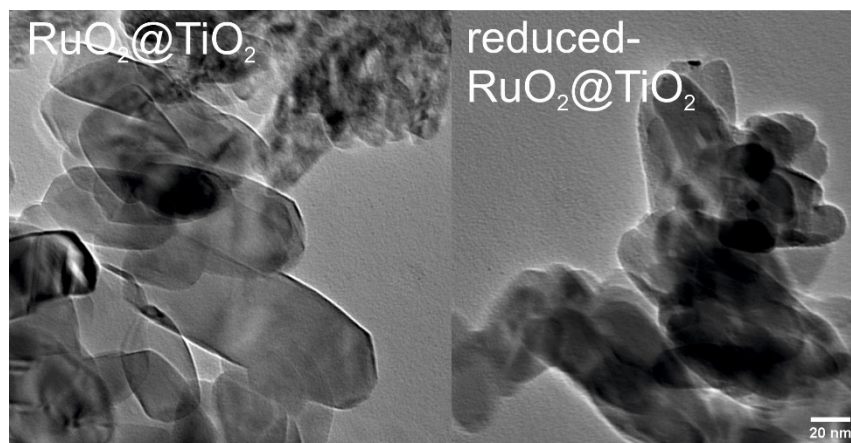

**Figure S5.** TEM micrographs of RuO<sub>2</sub>@TiO<sub>2</sub> (left) before and (right) after reduction. The particles seen correspond to TiO<sub>2</sub> with the RuO<sub>2</sub> not being clearly visible. No morphological changes can be identified after reduction.
